# Supplementary material for: The synergistic mechanism of phytic acid monolayers and iodide ions for inhibition of copper corrosion in acidic media
Source: Royal Society of Chemistry journal article supplement (doi:10.1039/c3ra47291d), 2014-01-01
Supplement: c3ra47291d.pdf [file c3ra47291d.pdf]

## Electronic Supplementary Information

### The Synergistic Mechanism of Phytic Acid Monolayers and Iodide Ions for Inhibition of Copper Corrosion in Acidic Media

Shu Shen, Cheng-di Zhu, Xiao-yu Guo, Chuan-chuan Li, Ying Wen, Hai-Feng Yang\*

*Department of Chemistry, Shanghai Key Laboratory of Rare Earth Functional Materials, Shanghai Normal University, 100 Guilin Road, Shanghai 200234, People's Republic of China.*

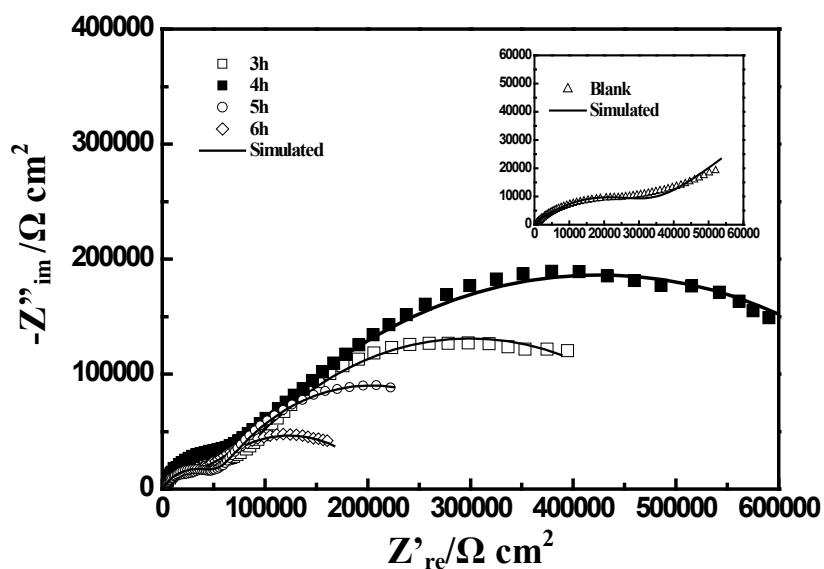

**Figure S1. Nyquist plots of copper electrodes in 0.5 M H<sub>2</sub>SO<sub>4</sub> solution with PA films formed from 0.1mM concentration of PA solution for different time.**

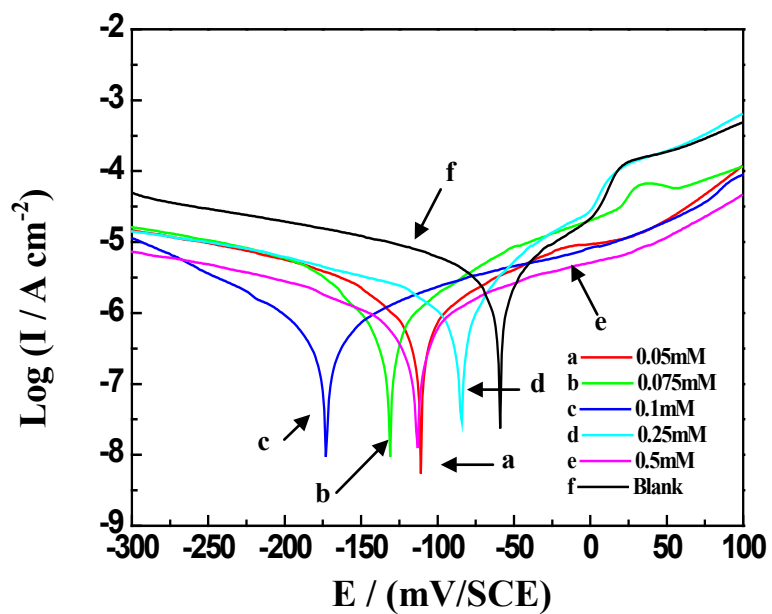

**Figure S2.** Potentiodynamic polarization curves in 0.5 M  $\text{H}_2\text{SO}_4$  solution for blank copper electrode and the presence of PA SAMs formed in different concentrations of PA solution for 4 h.

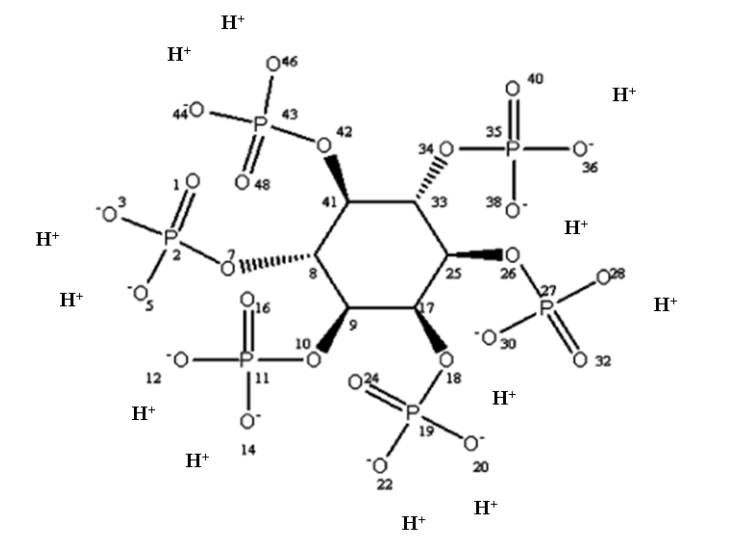

**Scheme S1 Structure of Phytic acid.**

**Table S1. EIS data of copper electrodes in 0.5 M H<sub>2</sub>SO<sub>4</sub> solution with PA films formed from 0.1mM concentration of PA solution for different time.**

| Time (h) | R <sub>s</sub> (Ω cm <sup>2</sup> ) | Q <sub>d</sub> (μY <sup>n</sup> ) | n    | R <sub>ct</sub> (kΩ cm <sup>2</sup> ) | Q <sub>r</sub> (μY <sub>r</sub> <sup>n</sup> ) | n    | R <sub>f</sub> (kΩ cm <sup>2</sup> ) | W (μΩ cm <sup>2</sup> ) | η (%) |
|----------|-------------------------------------|-----------------------------------|------|---------------------------------------|------------------------------------------------|------|--------------------------------------|-------------------------|-------|
| Blank    | 489.3                               | 1.101                             | 0.8  | 112.28                                |                                                |      |                                      | 0.1142                  |       |
| 3h       | 614.8                               | 0.3433                            | 0.73 | 72.7                                  | 5.995                                          | 0.64 | 463.2                                |                         | 79.0  |
| 4h       | 300                                 | 0.2017                            | 0.77 | 72.41                                 | 2.692                                          | 0.59 | 652.0                                |                         | 84.5  |
| 5h       | 230.5                               | 0.8982                            | 0.81 | 60.11                                 | 0.1513                                         | 0.80 | 295.6                                |                         | 68.4  |
| 6h       | 380.2                               | 1.374                             | 0.65 | 50.47                                 | 0.124                                          | 0.62 | 230.2                                |                         | 60.0  |

<sup>a</sup>The dimensions are S; s<sup>n</sup>/cm<sup>2</sup>; if n = 1, they are F cm<sup>-2</sup>

**Table S2. Potentiodynamic polarization parameters in 0.5 M H<sub>2</sub>SO<sub>4</sub> solution for blank copper electrode and the presence of PA SAMs formed in different concentrations of PA solution for 4 h.**

| concentration (mM) | -E <sub>corr</sub> (mV) | I <sub>corr</sub> (μA cm <sup>-2</sup> ) | η (%) |
|--------------------|-------------------------|------------------------------------------|-------|
| Blank              | 59                      | 166.8                                    |       |
| 0.05               | 111                     | 69.01                                    | 58.6  |
| 0.075              | 131                     | 52.71                                    | 68.4  |
| 0.1                | 173                     | 27.87                                    | 83.3  |
| 0.25               | 84                      | 47.71                                    | 71.4  |
| 0.5                | 113                     | 45.25                                    | 72.9  |
